# Supplementary material for: Hsa-miR-15a and Hsa-miR-16-1 Expression Is Not Related to Proliferation Centers Abundance and Other Prognostic Factors in Chronic Lymphocytic Leukemia
Source: Hindawi journal article supplement (doi:10.1155/2013/715391), 2013-01-01
Supplement: f1 [file 715391.f1.pdf]

**Supplementary Table 1. Crosstabulation between miRNA regulation and presence of 13q deletion**

**hsa-miR-16-5p Crosstabulation**

|          |      | Groups  |             | Total |
|----------|------|---------|-------------|-------|
|          |      | Deleted | Not Deleted |       |
| miR16-5p | DOWN | 11      | 8           | 19    |
|          | UP   | 7       | 8           | 15    |
| Total    |      | 18      | 16          | 34    |

Fisher Exact test Deleted VS Not Deleted p-value= 0,730

**hsa-miR-15a-5p Crosstabulation**

|           |      | Groups  |             | Total |
|-----------|------|---------|-------------|-------|
|           |      | Deleted | Not Deleted |       |
| miR15a-5p | DOWN | 5       | 5           | 10    |
|           | UP   | 9       | 9           | 18    |
| Total     |      | 14      | 14          | 28    |

Fisher Exact test Deleted VS Not Deleted p-value=1

**hsa-miR-15a-3p Crosstabulation**

|           |      | Groups  |             | Total |
|-----------|------|---------|-------------|-------|
|           |      | Deleted | Not Deleted |       |
| miR15a-3p | DOWN | 9       | 6           | 15    |
|           | UP   | 4       | 9           | 13    |
| Total     |      | 13      | 15          | 28    |

Fisher Exact test Deleted VS Not Deleted p-value=0,151

### hsa-miR-16-1-3p Crosstabulation

|           |      | Groups  |             | Total |
|-----------|------|---------|-------------|-------|
|           |      | Deleted | Not Deleted |       |
| miR15a-3p | DOWN | 13      | 2           | 15    |
|           | UP   | 5       | 15          | 20    |
| Total     |      | 18      | 17          | 35    |

Fisher Exact test Deleted VS Not Deleted p-value=0
